# Supplementary material for: Investigating pleiotropic effects of statins on ischemic heart disease in the UK Biobank using Mendelian randomisation
Source: eLife journal article supplement (doi:10.7554/elife.58567), 2020-08-24
Supplement: supp [file elife-58567-supp-v1.zip]

Archive with 4 entries (4 files):
- elife_poa_e58567_Supplementary_file_1.docx
- elife_poa_e58567_Tables_2_source_data_1.csv
- elife_poa_e58567_Tables_2_source_data_2.csv
- elife_poa_e58567_Transparent_Reporting_File.pdf
