# Supplementary material for: Investigating pleiotropic effects of statins on ischemic heart disease in the UK Biobank using Mendelian randomisation
Source: eLife journal article supplement (doi:10.7554/elife.58567), 2020-08-24
Supplement: supp [file elife-58567-supp-v1.zip › elife_poa_e58567_Tables_2_source_data_1.csv]

variant (hg19)	SNP	IHD_logodds	IHD_se	beta.testo	se.testo	effect_allele.exposure	LDL_beta	LDL_se
5:74560579:G:A	rs10066707	-0.009831875	0.010254047	-0.005195117	0.002279296	G	-0.036314	0.0036343
5:74562029:C:G	rs2006760	-0.016496834	0.012500512	-0.004215815	0.002778309	C	-0.03016	0.0043986
5:74641707:G:A	rs2303152	-0.005120005	0.01632722	-0.007102428	0.003632245	G	-0.02942	0.0058211
5:74648496:G:T	rs17238484	-0.014146136	0.011726406	-0.009063592	0.002607287	G	-0.044414	0.0041818
5:74656175:G:A	rs5909	-0.060856256	0.016674441	-0.005049482	0.003749827	G	-0.039083	0.006018
5:74656539:T:C	rs12916	-0.031768509	0.010003947	-0.007630924	0.00222605	T	-0.052679	0.0035665
4:106230148	rs532320857	0.145330403	0.155744855	0.171	0.029	C	-0.010785904	0.051500741
11:125081521	rs618888	0.007702619	0.010844336	0.028	0.003	T	-0.003394182	0.003719791
8:77879487	rs71529289	0.019674299	0.011355033	0.036	0.003	C	-0.00628714	0.003876004
X:66920179	rs776715248	-0.098325453	0.181589773	0.648	0.037	C	-0.0014164	0.056900235
X:54424009	rs1169638269�	0.01899677	0.016524898	0.027	0.005	CT	0.015663781	0.005625815
X:67932642	rs147676232	0.024678533	0.037438564	0.067	0.01	C	-0.015236287	0.012609883
X:53317280	rs140498714	-0.033195564	0.03545701	0.054	0.01	C	-0.015290234	0.012575479
1:163251833:G:A	rs71519251	-0.029088237	0.013811202	0.024	0.004	A	0.0064146	0.0047666
1:204161534:C:T	rs35737316	0.020783319	0.011496191	0.04	0.004	T	-0.0027445	0.0040869
1:32274901:T:C	rs72664935	-0.014786959	0.010082268	0.019	0.003	C	0.0091874	0.0035634
1:65921318:C:T	rs12410063	0.013977876	0.009953956	0.026	0.003	C	0.0027529	0.0035284
10:101746911:C:CA	rs796177770	0.000577714	0.010903592	0.019	0.003	C	0.0010331	0.0036972
10:104592249:A:C	rs4919686	0.011829598	0.010874676	0.023	0.003	A	0.0075001	0.0038519
10:121660465:T:G	rs7915430	0.007976719	0.012292674	0.021	0.004	T	-0.0091407	0.0043668
10:67262089:T:C	rs7912521	0.029534136	0.009967467	0.061	0.003	C	-0.0052914	0.0035453
11:118590743:A:G	rs503542	0.000864562	0.010004846	0.018	0.003	G	-0.001079	0.0035406
11:122773715:A:T	rs10892924	0.018649485	0.010043298	0.039	0.003	T	-0.001942	0.003554
11:28077708:G:GT	rs11389722	0.022817907	0.010582998	0.02	0.003	G	-0.0039377	0.0036118
11:29184521:T:C	rs116923389	0.020300016	0.036263697	0.098	0.011	T	0.0048711	0.012812
11:29200527:T:C	rs2035837	0.017984091	0.013978118	0.073	0.004	T	-0.0060948	0.0049504
11:72360935:C:A	rs55765314	-0.009679097	0.013383467	0.025	0.004	C	-0.0031538	0.0047607
11:94131557:C:A	rs12796488	-0.002199163	0.012836068	0.056	0.004	C	-0.0041062	0.0045785
12:114132310:C:A	rs61932784	0.018072567	0.012102306	0.022	0.004	C	0.0035099	0.0042672
12:116196322:G:A	rs12810788	-0.007268385	0.012932715	0.027	0.004	G	0.0094944	0.0044659
12:130952209:C:T	rs6486542	-0.001074302	0.010084625	0.026	0.003	C	-0.00013232	0.0035534
12:2908330:C:A	rs56196860	-0.088755774	0.028848728	0.321	0.009	A	0.0056231	0.010023
12:57359261:C:CA	rs34138930	0.024560597	0.015918321	0.038	0.005	C	0.0024504	0.0055682
13:100559123:C:A	rs2038695	0.010242671	0.010034441	0.023	0.003	C	-4.65E-06	0.0035451
13:112723111:C:CGGGCGT	rs137969745	-0.00126465	0.018079542	0.045	0.005	C	0.012669	0.0062812
14:35797122:T:C	rs10137488	-0.015464811	0.031162633	0.053	0.01	C	0.017314	0.010925
14:60886150:T:C	rs1272131	-0.018974185	0.010298984	0.027	0.003	C	-0.0052647	0.0036288
14:90007637:T:C	rs1812755	0.02810553	0.012705332	0.034	0.004	T	0.0031129	0.0044266
15:47551054:A:T	rs1454836	-0.016753486	0.010014321	0.017	0.003	T	0.0044025	0.003568
15:51530097:T:C	rs17703883	0.020693072	0.011309724	0.044	0.004	C	-5.63E-05	0.0040176
15:57300952:C:T	rs7496293	-0.000985217	0.009999029	0.023	0.003	T	0.0019968	0.0035379
15:60759011:A:G	rs12907068	0.0093352	0.014309641	0.023	0.004	G	0.0007842	0.0050931
15:89056040:C:A	rs13835	-0.010520689	0.009978809	0.019	0.003	A	-0.00018717	0.0035482
16:20060653:T:A	rs2764772	0.017588421	0.010430929	0.037	0.003	A	-0.0032135	0.0037126
16:28895130:A:G	rs8061590	0.001201363	0.010043422	0.029	0.003	A	0.003687	0.0035711
16:53822169:AT:A	16:53822169_AT_A	-0.001190852	0.010433421	0.018	0.003	AT	0.014207	0.0036992
16:73922719:T:G	rs62041532	0.001038177	0.012036515	0.023	0.004	G	-0.0056766	0.0042834
17:44095467:T:C	rs58879558	0.00776362	0.011664376	0.023	0.004	C	-0.0028236	0.0041523
17:7491331:C:T	rs545206972	0.158638976	0.058739342	0.252	0.019	T	0.017086	0.021477
17:7533423:G:A	rs1799941	0.027810307	0.011309441	0.034	0.003	G	0.01082	0.0039962
17:75612643:C:T	rs8076703	0.012490951	0.010761927	0.024	0.003	C	0.0079262	0.003829
18:44750365:C:T	rs2668776	0.008941289	0.009883022	0.029	0.003	C	-0.00087397	0.0035074
19:48369728:ATTT:A	19:48369728_ATTT_A	-0.023809433	0.015318372	0.028	0.004	A	0.0031832	0.0051076
19:49519873:G:C	rs6521	-0.012490023	0.009945656	0.019	0.003	C	-0.0035545	0.0035343
2:105871129:A:G	rs2438086	0.006581061	0.009973317	0.022	0.003	G	-0.0036389	0.0035429
2:11712075:G:T	rs13028479	0.004030735	0.010002539	0.031	0.003	G	0.0015887	0.0035382
2:177526156:C:T	rs2594948	0.006850284	0.01063431	0.018	0.003	T	-0.0041233	0.0037856
2:180497923:C:T	rs6718154	0.00415396	0.011089424	0.032	0.003	T	-0.0050606	0.0039214
2:18286651:A:T	rs6729954	-0.0024646	0.010111606	0.019	0.003	T	-0.002034	0.0035603
2:234627608:T:G	rs2011425	-0.007212334	0.018469447	0.05	0.006	T	-0.012764	0.0065165
2:30641234:A:G	rs829593	0.022913616	0.010703211	0.018	0.003	G	-0.006505	0.0037769
2:31989359:G:A	rs113017476	0.037174611	0.025450394	0.182	0.008	A	-0.0018562	0.0090951
20:33525407:G:A	rs7265992	-0.004232602	0.012987426	0.032	0.004	G	0.0021827	0.0046152
20:8878250:G:C	rs2327121	-0.002635549	0.010431644	0.018	0.003	C	0.0028885	0.0036923
22:31358580:CA:C	22:31358580_CA_C	0.016121212	0.010779238	0.018	0.003	C	-0.0024495	0.0037502
22:49678713:C:T	rs11703376	-0.000480411	0.011194452	0.04	0.003	T	0.0021446	0.0039606
3:107235109:T:C	rs34040779	-0.034810016	0.019357614	0.035	0.006	T	0.0048686	0.0068265
3:138053187:A:G	rs4678408	-0.023303698	0.010359903	0.026	0.003	G	0.0082103	0.0036534
3:152149372:CTT:C	3:152149372_CTT_C	0.010889613	0.016369539	0.038	0.005	C	-0.0064907	0.0058317
3:154801978:A:G	rs61762319	-0.073942345	0.029978843	0.05	0.009	G	0.016808	0.010357
3:24085166:A:G	rs1112195	0.000792255	0.009967762	0.018	0.003	G	0.0022781	0.0035204
3:28807441:G:T	rs9824196	0.014624098	0.01101628	0.026	0.003	T	-0.0043372	0.003905
3:53805577:G:C	rs3821866	-0.009003271	0.010192859	0.022	0.003	G	0.0024106	0.0036196
3:61279726:T:A	rs66956368	0.013070655	0.012190121	0.034	0.004	T	0.0010589	0.0040344
3:61662996:G:A	rs13065463	-0.028550446	0.014511271	0.032	0.005	G	0.0020541	0.0051795
3:65507808:T:C	rs10510939	0.020897685	0.010231418	0.017	0.003	C	-0.011513	0.003631
3:88173922:GT:G	3:88173922_GT_G	-0.006748747	0.014079046	0.032	0.004	GT	0.0074308	0.0048988
4:103651441:C:T	rs17254118	0.057819868	0.0366894	0.109	0.011	C	-0.0099342	0.012785
4:104590005:C:CA	rs565931739	0.009541247	0.014056701	0.047	0.004	C	0.0011989	0.0048372
4:104780790:A:AATGTGT	rs528845403	0.100583981	0.059518123	0.289	0.016	A	0.012186	0.018805
4:169077371:A:ATAT	rs375286460	0.011618614	0.010112374	0.019	0.003	ATAT	0.0055629	0.0035554
4:22028079:C:G	rs7679843	-0.012782458	0.017862468	0.05	0.005	G	0.0011341	0.0061308
4:69988378:C:T	rs4274916	-0.019697771	0.009860299	0.017	0.003	C	-0.00032906	0.0035034
5:134223593:A:G	rs3733897	-0.008928021	0.01433937	0.025	0.004	A	0.0041154	0.0051199
5:135680540:A:G	rs950716	0.01730402	0.014290356	0.034	0.004	A	-0.0012257	0.0050682
5:165932048:T:C	rs2961853	0.001675943	0.009884569	0.019	0.003	C	-0.0032902	0.0035084
5:95840231:T:C	rs72774885	0.007494208	0.013824713	0.027	0.004	C	0.0016735	0.0047946
6:100108564:TG:T	6:100108564_TG_T	0.008874381	0.009946302	0.029	0.003	T	0.0017163	0.0035279
6:105369598:C:T	rs9322822	0.010178173	0.01054516	0.049	0.003	C	-0.0099196	0.0037389
6:126760994:T:C	rs2184968	-0.035616234	0.009895184	0.02	0.003	C	-0.0091233	0.0035117
6:131929309:A:AC	rs71753454	-0.03584359	0.011912424	0.02	0.004	A	0.011033	0.0042657
6:152140576:A:G	rs190930099	-0.021901752	0.069054313	0.135	0.021	G	0.024939	0.023798
6:152343950:T:TAC	rs112714881	0.005039988	0.010834522	0.019	0.003	T	0.0031288	0.0037924
6:17416258:T:A	rs34192788	0.007580212	0.010905108	0.02	0.003	T	-0.0020385	0.0038231
6:27496598:A:G	rs79310511	0.005912769	0.023387968	0.043	0.007	G	0.0075769	0.0082532
6:29850827:T:C	rs1611581	-0.003003172	0.01292857	0.019	0.003	C	0.0050084	0.0039268
6:30903445:G:GT	rs539017487	0.018066315	0.01057725	0.039	0.003	GT	-0.0019435	0.0037345
6:32154285:A:G	rs204995	-0.003475736	0.011179549	0.027	0.003	A	0.0075403	0.0039694
6:34655818:G:C	rs11751920	-0.009232279	0.033544382	0.061	0.01	G	0.010949	0.011933
6:52728059:T:C	rs7454964	-0.011733007	0.009995634	0.017	0.003	T	0.010771	0.0035525
7:146123500:T:C	rs55795858	0.008491275	0.010859384	0.018	0.003	C	0.0027119	0.0037895
7:15019259:G:A	rs9986829	-0.011395067	0.009867072	0.056	0.003	A	0.0021249	0.0035108
7:40870935:A:G	rs10279715	-0.009614201	0.009899744	0.022	0.003	A	-0.0012125	0.0035209
7:72850178:T:C	rs1178947	0.007730747	0.012317332	0.024	0.004	T	-0.0047748	0.0043514
7:78482336:AG:A	7:78482336_AG_A	0.041692351	0.033519857	0.075	0.009	AG	-0.009054	0.010328
8:21112084:A:G	rs2631864	-0.006813465	0.016292743	0.033	0.005	G	-0.0043382	0.0057661
8:25247181:G:A	rs4872310	9.63E-05	0.011384866	0.023	0.004	G	0.00094561	0.0040432
8:34837357:G:A	rs4503095	0.024431184	0.017316277	0.03	0.005	G	-0.013789	0.0061541
8:61704817:A:G	rs4562360	0.006884819	0.011473716	0.032	0.004	G	-0.014158	0.004077
9:108967088:C:A	rs2090409	0.011468193	0.010629441	0.031	0.003	C	-0.0040583	0.0037822
9:11242155:C:T	rs745486	0.028276858	0.010993158	0.021	0.003	C	-0.00099521	0.0038924
9:117088064:T:A	rs10982156	-0.001347239	0.021265967	0.048	0.006	A	-0.012657	0.0071835
9:131956152:A:T	rs7872329	0.016057612	0.010726646	0.017	0.003	A	-0.0015234	0.0037931
9:140774721:T:C	9:140774721_T_C	0.00406	0.00983	0.023	0.003	C	-0.0022668	0.0035013
9:1960629:G:T	rs4483209	-0.001245253	0.009889724	0.017	0.003	T	0.0056242	0.0035105
9:24973797:A:G	rs10738700	-0.007991847	0.009989552	0.02	0.003	A	-0.0020704	0.0035481
9:77225603:G:C	rs912202	0.013267369	0.01037255	0.04	0.003	C	-0.00086537	0.0036875
X:109697443:T:C	rs41306249	-0.012253291	0.016317581	0.042	0.005	T	-0.002952	0.0059048
X:11209184:C:T	rs138271349	0.006134888	0.015863788	0.028	0.005	T	0.0035105	0.0056785
X:131802339:G:C	rs243466	0.012345781	0.007701441	0.013	0.002	C	-0.0014732	0.0027371
X:133680547:G:A	rs757309	-0.001901535	0.00731078	0.018	0.002	A	0.00080286	0.0026023
X:135998134:CA:C	X:135998134_CA_C	0.011822725	0.007104328	0.017	0.002	CA	-0.0021933	0.0025271
X:146444527:C:A	rs5905042	-0.005266898	0.007614542	0.023	0.002	C	-0.0045246	0.0027135
X:150343248:G:T	rs10218066	0.001378723	0.008713025	0.015	0.003	G	0.00093818	0.0030672
X:30331349:A:G	rs1034948	3.84E-05	0.010225197	0.018	0.003	G	0.0051895	0.0036433
X:50372904:G:T	rs5915287	0.001313667	0.007213111	0.012	0.002	G	-0.0011158	0.0025653
X:56815741:G:C	rs5913997	0.011162591	0.008757135	0.053	0.003	G	-0.0023705	0.003134
X:63265012:G:A	rs146225865	-0.075997279	0.029701525	0.094	0.01	G	0.021792	0.011025
X:65883683:C:T	rs73221538	-0.007394063	0.010603355	0.056	0.003	C	-0.0058168	0.0037758
X:8906695:T:C	rs111386834	0.021950621	0.007815484	0.132	0.002	C	-0.0093512	0.0027962
X:99946825:A:G	rs6616174	9.03E-05	0.007258654	0.016	0.002	G	-0.0011665	0.0025808
