# Supplementary material for: Investigating pleiotropic effects of statins on ischemic heart disease in the UK Biobank using Mendelian randomisation
Source: eLife journal article supplement (doi:10.7554/elife.58567), 2020-08-24
Supplement: supp [file elife-58567-supp-v1.zip › elife_poa_e58567_Tables_2_source_data_2.csv]

variant (hg19)	SNP	IHD_logodds	IHD_se	testosterone_beta	testosterone_se	effect_allele.exposure	LDL_beta	LDL_se
5:74656539:T:C	rs12916	0.01005664	0.013513413	-0.002739	0.0036425	C	0.069542	0.0032704
5:74560579:G:A	rs10066707	0.025785313	0.015326535	-0.001478	0.0037059	A	0.04419	0.0033329
5:74648496:G:T	rs17238484	0.015458129	0.017468908	-0.0018071	0.0042608	T	0.056842	0.0038267
5:74562029:C:G	rs2006760	0.020037298	0.018598504	-0.0050745	0.0044792	G	0.039035	0.0040302
5:74641707:G:A	rs2303152	-0.011086793	0.02465743	-0.00534	0.0059388	A	0.034164	0.0053473
5:74656175:G:A	rs5909	0.031819289	0.024981132	0.00025476	0.0061432	A	0.056092	0.0055142
14:106875550	rs77432559	-0.053841694	0.034599117	0.037	0.006	G	-0.012702118	0.007846309
4:103423549	rs28484580	-0.012298254	0.023103552	0.021	0.004	G	0.009150772	0.005329283
1:101737743:T:C	rs6684361	-0.001891732	0.014526525	0.076	0.003	C	-0.0015176	0.0034933
1:107607035:T:TCAG	rs3032555	0.01007383	0.014185504	0.018	0.003	T	0.017929	0.0034237
1:113150644:T:A	rs7519368	0.005251533	0.014935712	0.033	0.003	T	-0.0027303	0.0036057
1:120013323:G:A	rs72693130	-0.026653947	0.029443905	0.031	0.006	A	0.003646	0.0068046
1:150186390:AG:A	1:150186390_AG_A	0.003070691	0.013380233	0.017	0.003	A	0.0076325	0.0032393
1:150839698:C:CA	rs58175144	-0.022424072	0.015043974	0.021	0.003	CA	0.0061103	0.003559
1:154984363:G:A	rs1870940	-0.004120434	0.015091475	0.025	0.003	G	0.0054839	0.0036238
1:156009127:T:C	rs76830943	0.002626368	0.017987024	0.024	0.004	T	0.0025293	0.0043164
1:168234645:G:A	rs12564492	-0.017488056	0.014477858	0.02	0.003	A	-0.0027647	0.0035107
1:179276742:C:CA	rs569421885	-0.005506138	0.015449901	0.055	0.003	CA	-0.0026878	0.0037306
1:197868281:G:C	rs2062479	-0.014584698	0.01363803	0.016	0.003	C	-0.0017885	0.0032498
1:216905301:C:T	rs17043570	0.027623566	0.018027129	0.025	0.004	T	0.0042273	0.0043888
1:218537310:T:C	rs12078363	-0.013377998	0.014237264	0.028	0.003	T	0.003281	0.0034406
1:22102328:G:C	rs10799713	-0.020237447	0.016270191	0.027	0.003	G	0.0058826	0.0039277
1:234734956:C:T	rs10910476	-0.025961764	0.013479954	0.017	0.003	C	-0.015954	0.0032451
1:31263360:T:C	rs7530117	-0.005054652	0.01414042	0.018	0.003	T	0.00099465	0.0033769
1:41453453:G:T	rs4453027	0.021043675	0.01377232	0.023	0.003	G	-0.0044549	0.0032826
1:50891213:A:C	rs1278526	-0.016455082	0.01335516	0.019	0.003	A	-0.0025992	0.0032202
1:57016477:C:G	rs7529520	-0.010336231	0.013349085	0.018	0.003	C	0.0056968	0.0032222
1:66738623:A:G	rs505237	0.008493262	0.013694546	0.016	0.003	G	-0.0011096	0.0033026
1:68846740:C:CA	rs111882448	-0.00306013	0.014572779	0.017	0.003	CA	0.0019283	0.0034328
1:7843711:T:C	rs571084788	-0.004152742	0.017281158	0.024	0.004	T	0.0026136	0.0041134
1:93104655:G:A	rs4294422	0.01244973	0.013747742	0.019	0.003	G	-0.013347	0.0033334
10:1037737:G:T	rs35249079	0.011706025	0.013291912	0.022	0.003	T	-0.0032003	0.0032106
10:104623053:C:G	rs11191421	0.005169527	0.015488137	0.037	0.003	C	4.83E-05	0.0037456
10:105532165:A:C	rs11191801	-0.013526346	0.014494054	0.023	0.003	A	-0.0025989	0.0035228
10:126834851:AT:A	10:126834851_AT_A	-0.008622597	0.014725583	0.016	0.003	A	0.0026213	0.0033588
10:5034014:ATTAC:A	10:5034014_ATTAC_A	0.126250903	0.124712262	0.183	0.019	ATTAC	0.019127	0.022615
10:5062752:C:A	rs36032941	0.004578791	0.01483374	0.063	0.003	C	0.0014329	0.0035465
10:61467182:G:T	rs1171617	-0.001582503	0.015666609	0.052	0.003	T	0.01274	0.003793
10:65271488:A:T	rs10740131	-0.015821857	0.013317894	0.028	0.003	T	0.01192	0.0032158
10:69819917:T:C	rs674486	-0.006833552	0.0139167	0.018	0.003	C	-0.00027724	0.0033672
10:70983936:G:C	rs35199395	0.005759992	0.014461171	0.017	0.003	C	-0.0033727	0.0034895
10:90759916:G:T	rs2147419	0.007163192	0.014834235	0.018	0.003	T	-0.0012107	0.0035716
10:94441992:AG:A	rs745932882	0.005992559	0.013502219	0.027	0.003	AG	-0.006995	0.0032391
10:96823812:C:A	rs111328885	-0.014087907	0.020062901	0.033	0.004	C	0.0062901	0.004886
11:110176972:CT:C	11:110176972_CT_C	-0.025928449	0.013727104	0.017	0.003	CT	0.001665	0.0032725
11:123325111:C:T	rs75848431	-0.043145074	0.01875702	0.032	0.004	T	0.0017708	0.0044773
11:123438708:TGAG:T	11:123438708_TGAG_T	0.016541281	0.021389385	0.048	0.005	T	-0.0034896	0.0051332
11:128269098:G:A	rs76299412	0.002739022	0.018670581	0.035	0.004	A	-0.0028147	0.0044905
11:18082483:A:G	rs11024458	-0.016522001	0.014926958	0.019	0.003	A	-0.0039934	0.0036093
11:27236061:C:G	rs10501081	-0.012405434	0.019490413	0.022	0.004	G	0.0040389	0.0046751
11:2936657:G:A	rs440150	-0.021051048	0.023233741	0.026	0.005	G	-0.024542	0.0055471
11:30226356:T:C	rs11031005	-0.055100787	0.01925946	0.033	0.004	C	0.0038535	0.0045926
11:62914202:A:G	rs1939769	-0.044807195	0.027206168	0.083	0.006	A	0.0071743	0.0064521
11:64323613:C:T	rs35008345	-0.09524449	0.088967965	0.183	0.019	C	-0.013031	0.02194
11:68097049:G:A	rs312023	8.82E-06	0.013383945	0.028	0.003	G	0.00070142	0.0032223
11:72317557:C:T	rs171021	-0.024594312	0.014452982	0.038	0.003	C	0.00093809	0.0035089
11:72947934:G:A	rs11235688	-0.013742154	0.013516692	0.022	0.003	G	0.0056134	0.0032604
12:107259470:T:C	rs7977247	-0.007352017	0.013418077	0.018	0.003	T	-0.003377	0.003251
12:115556307:T:G	rs35427	0.029791649	0.014426166	0.017	0.003	T	-0.0055558	0.0033722
12:121416622:C:G	rs1169289	0.007168144	0.013565019	0.019	0.003	G	0.026695	0.0032583
12:123639761:TAAATA:T	12:123639761_TAAATA_T	-0.015309385	0.017370309	0.019	0.004	TAAATA	-0.005131	0.0041589
12:125075660:G:A	rs837493	0.002141616	0.013329322	0.016	0.003	G	-0.0032464	0.0032256
12:12738486:A:G	rs881613	0.001592909	0.014867532	0.017	0.003	A	-3.87E-06	0.0035384
12:21331549:T:C	rs4149056	-0.011072128	0.01863561	0.029	0.004	C	-0.0054697	0.0044861
12:2908330:C:A	rs56196860	0.038090998	0.038411094	0.058	0.008	C	0.00087484	0.0091885
12:48254353:T:A	rs117913411	-0.041809404	0.036974816	0.048	0.008	T	0.019264	0.0090431
12:49180828:G:A	rs35801460	-0.025421754	0.016430403	0.02	0.003	G	0.0029888	0.0039927
12:49441189:CT:C	12:49441189_CT_C	0.032038703	0.054753334	0.061	0.01	CT	-0.00092418	0.011616
13:109960307:T:C	rs72660136	-0.009818576	0.036152304	0.06	0.008	T	-0.0056413	0.0088123
13:22314146:T:C	rs9506725	0.005486797	0.013696701	0.052	0.003	T	-0.0041917	0.0033175
13:22690127:G:A	rs9552597	0.029248932	0.016713543	0.035	0.004	A	-0.0040705	0.0040817
13:32353100:C:A	rs4943729	0.016630692	0.013242515	0.015	0.003	A	0.0044131	0.0032068
13:33728353:G:A	rs17764067	0.014232791	0.016426153	0.021	0.003	G	0.00077852	0.00392
13:73131694:A:C	rs17245822	0.0319481	0.013889702	0.028	0.003	C	-0.003472	0.0033458
13:73203811:T:G	rs9599996	0.013703218	0.013677419	0.017	0.003	T	-0.0080576	0.0032847
14:101178804:C:G	rs12893790	-0.00188543	0.017118396	0.021	0.004	G	-0.0076473	0.0041397
14:21555063:A:G	rs7342537	-0.046789657	0.051421622	0.107	0.011	G	0.018294	0.012045
14:64898076:A:G	rs59397130	-0.045817229	0.042570611	0.056	0.009	G	0.012519	0.010082
14:65606248:C:T	rs61987429	-0.001508078	0.014030044	0.017	0.003	C	-0.0012638	0.0033752
14:68698230:A:G	rs1314911	0.001116103	0.019015025	0.026	0.004	A	-0.012433	0.0046139
14:69237902:G:A	rs72731535	0.000560024	0.017374112	0.025	0.004	G	0.0035903	0.0042025
14:94838142:G:T	rs112635299	0.095336354	0.048415505	0.062	0.01	G	-0.026349	0.011149
14:98550490:T:C	rs12436785	0.007151831	0.013423804	0.03	0.003	C	-0.0020727	0.0032521
14:99727591:A:G	rs10147094	-0.011641021	0.013839045	0.022	0.003	A	0.00068354	0.0033222
15:40360314:T:C	rs11638521	0.000838372	0.013919655	0.064	0.003	T	0.0048372	0.0033643
15:40720543:T:C	rs61661087	-0.011659015	0.013247968	0.028	0.003	C	0.00024444	0.0032074
15:41531518:G:GT	rs34584018	-0.0630882	0.014511302	0.016	0.003	G	0.004111	0.0033673
15:50668999:A:T	rs72738949	-0.012549893	0.013528976	0.019	0.003	T	0.0055271	0.0032531
15:60977882:C:T	rs2113944	-0.015502825	0.016237995	0.027	0.003	T	0.0074339	0.0038798
15:66049600:TG:T	15:66049600_TG_T	0.013722228	0.013564442	0.019	0.003	TG	-0.0017344	0.0032509
15:75454879:G:C	rs12708515	-0.005180048	0.013928707	0.021	0.003	G	-0.00089968	0.0033446
15:79840557:C:T	rs4464040	0.003413581	0.018675537	0.045	0.004	C	-0.004748	0.0045089
15:85558140:C:T	rs12900736	-0.002864641	0.017671211	0.04	0.004	C	1.57E-05	0.004296
15:91009484:G:A	rs2074585	-0.001768993	0.013238779	0.016	0.003	A	0.0033295	0.0032047
16:12907061:T:C	rs8045779	0.007624892	0.01801523	0.026	0.004	T	-0.0010443	0.0043376
16:30813454:A:AT	rs534645300	-0.001057543	0.015984228	0.021	0.003	AT	0.0068	0.0037958
16:4156423:T:C	rs437115	0.007225013	0.013528665	0.028	0.003	T	-0.0045018	0.003251
16:67420328:C:G	rs8044588	-0.003870048	0.023231914	0.028	0.005	C	-0.0021638	0.0056162
16:81590541:T:C	rs58072681	-0.034353145	0.026642448	0.108	0.006	C	-0.0049308	0.0062892
17:16852187:A:G	rs34557412	-0.094964174	0.076209334	0.107	0.017	A	-0.054872	0.018874
17:17387899:C:T	rs1242518	0.011087041	0.015319631	0.02	0.003	T	-0.0072483	0.0036878
17:2309972:A:G	rs187370584	-0.082584011	0.056655792	0.066	0.012	A	-0.0017534	0.014115
17:53371413:TA:T	17:53371413_TA_T	-0.001146921	0.013923559	0.019	0.003	TA	-0.0026197	0.0033366
17:63708321:T:C	rs232159	-0.009761769	0.014084768	0.018	0.003	C	0.0025699	0.0033887
17:6525861:T:C	rs9898480	0.012044157	0.013352066	0.018	0.003	T	7.02E-05	0.0032291
17:66879927:C:T	rs34931250	-0.039229615	0.027274352	0.054	0.006	C	-0.020884	0.0067019
17:7533015:C:T	rs62059839	-0.002515299	0.01512649	0.032	0.003	T	-0.012132	0.0036546
17:81058362:G:GC	rs532213132	0.012197505	0.014440973	0.016	0.003	GC	-0.0025397	0.0034457
17:8219478:A:G	rs2270445	-0.02212848	0.013439422	0.017	0.003	G	0.011898	0.0032288
18:13921536:C:T	rs2186945	-0.001000559	0.018168984	0.025	0.004	C	0.007011	0.0043819
18:3818842:C:A	rs28421540	-0.010151964	0.014787097	0.031	0.003	A	-0.0020272	0.003563
18:51851616:C:A	rs34163044	-0.013651743	0.013627868	0.017	0.003	A	-0.0071102	0.0032713
18:71883232:C:A	rs112367565	0.016284962	0.031235532	0.049	0.007	A	0.0026189	0.0076379
18:71896469:G:A	rs9319895	0.012843776	0.01434555	0.023	0.003	A	0.00039552	0.0033251
18:71916636:C:A	rs117327231	-0.009042831	0.044264758	0.173	0.009	A	0.016731	0.010741
19:10471462:C:T	rs8111359	-0.00756178	0.023017369	0.06	0.005	C	-0.0057161	0.0055423
19:12509536:C:A	rs4804181	-0.003946898	0.01627606	0.037	0.003	C	-0.0035875	0.003911
19:1814025:G:A	rs12977787	-0.023011125	0.013277949	0.015	0.003	A	0.0038372	0.0032108
19:18394549:T:TAAA	rs10686842	-0.019092533	0.013736153	0.028	0.003	TAAA	-0.010009	0.0033335
19:41985931:A:T	rs11673591	0.013555864	0.015210819	0.028	0.003	A	-0.0050812	0.0037032
19:42914668:G:A	rs138983180	-0.004654652	0.088011356	0.162	0.019	A	0.029021	0.021203
19:46203083:G:A	rs7256920	0.036152057	0.013426829	0.019	0.003	G	-0.0018671	0.0032276
19:47715837:TC:T	rs774224295	-0.017986332	0.015107099	0.019	0.003	T	0.0024221	0.0035614
19:48335029:T:C	rs2879910	0.003311708	0.013572987	0.016	0.003	C	-0.0012619	0.0032451
19:49517140:C:T	rs75287599	-0.000849975	0.024903934	0.043	0.005	T	-0.008343	0.0060158
2:103338672:T:C	rs113247979	-0.06721623	0.078593425	0.14	0.017	T	-0.024842	0.019377
2:111934107:T:G	rs590097	0.015047778	0.013955319	0.061	0.003	G	0.0032692	0.0033583
2:112071459:G:T	rs62162863	0.013622147	0.017565638	0.023	0.003	G	0.0011702	0.0036159
2:112375425:C:T	rs10168169	-0.02277499	0.017425187	0.033	0.004	T	-0.009262	0.0041755
2:12555164:T:C	rs34269793	0.016118497	0.029468894	0.064	0.006	C	-0.0028074	0.0071789
2:135432074:CGCGCGCTACCATATCT:C	2:135432074_CGCGCGCTACCATATCT_C	0.002403918	0.014037784	0.017	0.003	C	-0.0079696	0.0033393
2:136970398:G:A	rs59741822	-0.003489511	0.02537204	0.033	0.005	G	-0.02119	0.0061061
2:17766649:T:TA	rs35397738	-0.001888391	0.014818328	0.02	0.003	TA	0.0019286	0.003463
2:178153430:C:T	rs58723250	0.017104475	0.016507672	0.035	0.004	T	-0.0066169	0.0040164
2:197779590:C:T	rs36088520	-0.009569617	0.022051139	0.028	0.005	T	-0.0042571	0.0052877
2:20412227:G:A	rs3771243	0.001395661	0.013619005	0.029	0.003	A	-0.012833	0.0032932
2:208773860:C:T	rs873779	0.002661298	0.01371109	0.016	0.003	C	0.00082308	0.0033212
2:234627608:T:G	rs2011425	-0.034049435	0.024591271	0.033	0.005	T	-0.011999	0.005963
2:242339644:A:AAG	rs10687319	-0.008150124	0.013343903	0.015	0.003	AAG	-0.011043	0.003218
2:24990082:A:G	rs11892043	-0.018981007	0.014804864	0.022	0.003	A	0.007119	0.0036024
2:27730940:T:C	rs1260326	-0.01013739	0.013523946	0.037	0.003	C	-0.035136	0.0032818
2:32504650:AT:A	2:32504650_AT_A	-0.017360098	0.015362813	0.017	0.003	A	-0.0018445	0.0035678
2:43271621:C:G	rs2374456	0.01160856	0.013607468	0.024	0.003	G	0.0022657	0.0032711
2:43515427:C:T	rs7575635	0.041835619	0.016996044	0.038	0.004	C	-0.011548	0.0040629
2:48031372:C:T	rs3136354	0.012559461	0.013348329	0.024	0.003	C	0.0021717	0.0032706
2:48942282:T:A	rs11125180	0.002388245	0.023086125	0.033	0.005	A	-0.0034877	0.0055937
2:62536671:A:T	rs7573187	0.00273892	0.013324602	0.019	0.003	A	0.00024568	0.0032236
2:65276049:T:C	rs1009360	-0.03673375	0.01353291	0.018	0.003	C	-0.0056386	0.0032622
2:86095432:C:T	rs10865479	0.013079495	0.014775949	0.022	0.003	T	0.0053133	0.0035604
20:31189078:C:T	rs11697333	-0.001219997	0.014505118	0.019	0.003	T	-0.0041059	0.0034641
20:39179822:G:C	rs1883711	-0.111878606	0.037634464	0.05	0.008	G	-0.11196	0.0093622
20:48909667:C:T	rs6020423	0.008802512	0.015528272	0.04	0.003	C	-0.0031185	0.0037505
20:52731402:A:T	rs6127099	-0.011219072	0.015495223	0.018	0.003	A	0.013766	0.0036527
20:57280575:T:C	rs6100174	-0.00643681	0.013669936	0.02	0.003	C	-0.0027553	0.0033066
20:60691366:CT:C	20:60691366_CT_C	0.030252173	0.017967746	0.019	0.004	C	-0.00096791	0.0040552
20:62711459:C:T	rs8126001	-0.018221089	0.013313283	0.02	0.003	T	-0.0069323	0.0032189
21:18294462:C:T	rs2824138	-0.016260243	0.017278225	0.026	0.004	C	0.00042773	0.0041641
21:33750632:T:C	rs74652944	-0.090354903	0.07920931	0.183	0.016	C	-0.019066	0.01826
21:40645556:AAGGCTGAGATGGGGGGAC:A	21:40645556_AAGGCTGAGATGGGGGGAC_A	0.008617966	0.016983037	0.021	0.004	A	0.0081436	0.0040091
21:43349613:GC:G	21:43349613_GC_G	-0.002115204	0.025474877	0.033	0.005	G	-0.0033524	0.0059601
21:43372219:T:C	rs12185851	0.009762421	0.015706089	0.021	0.003	C	-2.12E-05	0.0038045
22:22453513:C:T	rs9611014	0.002497476	0.01651391	0.023	0.003	C	-0.0024614	0.0039404
22:29127224:A:T	rs8184986	-0.005309404	0.019663198	0.023	0.004	A	0.01421	0.0047388
22:29647854:A:G	rs12628709	-0.013611346	0.021391414	0.026	0.005	G	-0.0062995	0.0051544
22:30524248:C:T	rs4820829	0.010388304	0.044359023	0.058	0.009	C	-0.021757	0.010676
22:31626042:CTT:C	22:31626042_CTT_C	-0.011423048	0.013848306	0.016	0.003	CTT	-0.0035451	0.0032946
22:42545221:G:A	rs5751229	-0.014130883	0.016138181	0.025	0.003	A	-0.0030437	0.0038491
22:46633782:G:A	rs6008259	-0.013535209	0.017305596	0.034	0.004	G	-0.011884	0.0041847
22:46656246:T:G	rs7291444	-0.020298511	0.018576574	0.033	0.004	T	-0.010621	0.0045145
3:10545125:C:G	rs7618363	0.008129684	0.018179054	0.037	0.004	C	0.0041777	0.0043856
3:119786083:CA:C	3:119786083_CA_C	0.010443924	0.013979435	0.017	0.003	CA	-0.012382	0.0033381
3:133814887:G:GT	rs71624037	0.040982217	0.02565866	0.036	0.005	G	-0.0098806	0.0061318
3:14423060:C:T	rs62231822	0.006618293	0.022338013	0.049	0.005	C	-0.0048844	0.0053951
3:152084243:G:A	rs7633673	0.012910786	0.013483218	0.026	0.003	G	-0.0043415	0.0032592
3:156851624:CA:C	3:156851624_CA_C	0.002993786	0.014291308	0.019	0.003	C	-0.003858	0.0034134
3:169177924:C:T	rs9850919	0.005265266	0.013516783	0.02	0.003	C	-0.00040344	0.003269
3:195942080:T:TG	rs5855544	0.006074431	0.013925683	0.033	0.003	T	0.0090738	0.0032987
3:20085213:CTT:C	3:20085213_CTT_C	0.004611809	0.017375702	0.021	0.004	C	-0.0039285	0.0041603
3:23478055:A:AT	rs534141419	-0.000483464	0.013776129	0.018	0.003	A	0.0041924	0.0033255
3:27554392:CT:C	3:27554392_CT_C	0.055164848	0.040442132	0.054	0.009	C	-0.0076587	0.0099127
3:41105589:T:C	rs17201704	0.022459359	0.01947255	0.043	0.004	T	-0.0095739	0.0046471
3:51738256:A:G	rs4067	-0.026041907	0.018702379	0.024	0.004	G	0.010356	0.0045509
3:52507719:G:C	rs13094915	-0.019056912	0.013891422	0.016	0.003	G	-0.01226	0.0033486
3:72398979:G:A	rs9832502	0.027969607	0.015308692	0.017	0.003	A	-0.00074984	0.0037137
3:73874699:G:T	rs167096	0.00835773	0.01524619	0.017	0.003	T	0.0023458	0.0036734
4:100239319:T:C	rs1229984	0.00390413	0.045590346	0.049	0.009	C	0.039766	0.010934
4:1008212:C:T	rs77822621	0.014345279	0.032937515	0.048	0.007	T	-0.01287	0.0079955
4:102366529:C:A	rs4586943	-0.023171511	0.014874255	0.018	0.003	A	0.0055409	0.0035754
4:106094427:G:A	rs2903385	0.018478339	0.013261543	0.025	0.003	A	0.007095	0.0032081
4:109038654:G:A	rs4245930	0.00880912	0.013723901	0.025	0.003	G	-0.0074985	0.0033238
4:113956908:CAGAT:C	rs749512116	0.011552062	0.017503617	0.033	0.004	CAGAT	-0.00095003	0.0041845
4:177614117:G:A	rs371162363	-0.02278428	0.025135701	0.039	0.005	G	0.0024437	0.0057384
4:53860084:T:A	rs3849653	0.023330467	0.013320763	0.019	0.003	A	0.003882	0.0032216
4:55087241:C:CA	rs200457494	0.015818537	0.017221573	0.025	0.004	CA	-0.00085923	0.0040332
4:57746479:TA:T	4:57746479_TA_T	0.002702299	0.01350554	0.02	0.003	TA	-0.00085348	0.0032439
4:69946004:A:G	rs4632729	-0.019036938	0.013284442	0.028	0.003	A	-0.0077522	0.0032188
4:77420598:G:GTATAAC	rs60117481	0.015493706	0.013830668	0.019	0.003	G	0.0109	0.0033535
5:122741746:C:T	rs11948639	-0.041617856	0.013386359	0.017	0.003	T	0.0016176	0.0032377
5:124205385:G:C	rs12658172	0.040330685	0.018875259	0.052	0.004	G	0.00055576	0.0044549
5:127870642:T:C	rs13184921	-0.027710614	0.015596088	0.025	0.003	T	0.0086879	0.0037508
5:142507651:G:A	rs3776299	-0.018820674	0.01335197	0.017	0.003	G	-0.00031213	0.0032282
5:142819900:C:CAT	rs34632394	-0.009806824	0.013696354	0.017	0.003	CAT	-0.00046188	0.0032714
5:158252500:G:GA	rs33959428	-0.012186988	0.014596015	0.018	0.003	G	-0.0025335	0.0034818
5:176782218:T:C	rs13153019	-0.008874643	0.015650814	0.024	0.003	C	0.00049087	0.0037315
5:35247932:A:G	rs112694713	0.158924304	0.063925043	0.107	0.012	A	-0.015553	0.014222
5:55861894:G:A	rs9687846	-0.030201786	0.016404107	0.026	0.004	G	-0.026598	0.004039
5:76461706:C:T	rs4431325	-0.086204479	0.029419651	0.05	0.006	T	0.005947	0.0068517
5:76488613:C:T	rs1119208	-0.01188004	0.013876652	0.03	0.003	C	-0.0015601	0.0033662
5:77987524:A:G	rs784420	-0.001242969	0.014591211	0.039	0.003	G	-0.0017666	0.0035318
6:119171866:T:C	rs1032388	0.003512973	0.01596552	0.054	0.003	C	-0.0076065	0.0038666
6:127205535:AAAACAGATAC:A	rs779008104	-0.019721094	0.013510892	0.024	0.003	AAAACAGATAC	0.015939	0.0032553
6:127440047:T:C	rs577721086	-0.041026403	0.030283011	0.055	0.007	T	-0.040867	0.007413
6:1377048:G:A	rs75217853	-0.025138077	0.022598504	0.035	0.005	A	0.006578	0.0054122
6:144301525:GT:G	6:144301525_GT_G	-0.003971731	0.01497962	0.028	0.003	G	-0.00012335	0.0034959
6:144620688:T:C	rs2473140	-0.03236927	0.023428841	0.029	0.005	C	-0.010915	0.0056003
6:157124080:T:A	rs287884	-0.007489655	0.013458113	0.019	0.003	A	0.0043841	0.0032388
6:159224561:A:T	rs9457466	-0.016722749	0.013845087	0.017	0.003	A	0.0053045	0.0033325
6:170588559:T:G	rs2344744	-0.004242376	0.01340944	0.018	0.003	G	0.0050006	0.0032421
6:24697424:T:C	rs6904345	0.012582637	0.013793984	0.017	0.003	T	-0.0015705	0.0033322
6:25879539:C:A	rs487624	0.003079544	0.013348587	0.019	0.003	C	0.0070625	0.0032319
6:30808762:C:T	rs2517582	-0.006287705	0.013622227	0.028	0.003	T	0.0044707	0.0032963
6:31900754:G:C	rs184265581	-0.066806996	0.063503273	0.132	0.013	C	0.038582	0.014843
6:34753277:GA:G	6:34753277_GA_G	0.040319984	0.015756213	0.018	0.003	G	-0.0054589	0.0038081
6:43354431:A:G	rs1214761	-0.027163102	0.014119857	0.031	0.003	G	0.0037022	0.003437
6:52642768:C:T	rs2608652	-0.003006687	0.013266961	0.015	0.003	T	-0.0061925	0.0032105
6:7842121:G:T	rs267190	5.38E-05	0.013464389	0.015	0.003	G	-0.002271	0.0032513
7:127015083:G:A	rs62621812	-0.050787626	0.051732476	0.053	0.01	A	0.035627	0.011735
7:137801444:C:T	rs1872930	0.005897504	0.016378694	0.051	0.003	T	-0.0016222	0.0039605
7:156311745:A:G	rs9638084	0.008120129	0.013576695	0.021	0.003	G	0.0011689	0.0032716
7:25950880:G:A	rs28612846	0.004225066	0.015185301	0.016	0.003	G	0.01084	0.0038027
7:47522085:C:CA	rs11427441	-0.001606584	0.013897002	0.02	0.003	CA	-0.0023911	0.0033734
7:69218337:T:C	rs6460528	-0.008372291	0.013340269	0.015	0.003	T	0.0034071	0.0032251
7:73030175:G:A	rs13229619	-0.004282342	0.019714632	0.054	0.004	A	-0.005684	0.0047596
7:75610876:C:T	rs17853284	-0.045856525	0.096994739	0.304	0.021	C	-0.0022337	0.02374
7:98188671:CCTT:C	7:98188671_CCTT_C	0.249394567	0.121635618	0.164	0.022	CCTT	0.021398	0.025308
7:99332948:T:G	rs45446698	0.073078263	0.033663026	0.371	0.007	T	-0.026718	0.0079449
8:101277640:T:C	rs1660322	-0.009904246	0.014296157	0.023	0.003	T	0.0034722	0.0034621
8:105978368:T:A	rs11774829	-0.040596574	0.022845001	0.056	0.005	A	0.0069661	0.0053685
8:10606421:A:C	rs6997799	0.0035585	0.015783762	0.024	0.003	C	-0.0070957	0.0038054
8:11543663:C:G	rs56109436	-0.004577258	0.02233049	0.026	0.005	G	0.010802	0.0053882
8:143987427:T:G	rs4736359	0.032317336	0.013325424	0.037	0.003	T	-0.0053799	0.0032247
8:23400588:T:TTTA	rs199787521	0.006482772	0.015620768	0.029	0.003	TTTA	-0.0076781	0.0037748
8:25417528:G:A	rs17053931	0.012150962	0.016564054	0.021	0.004	A	0.0053219	0.0040193
8:37532984:A:G	rs11782259	0.043834432	0.023504367	0.031	0.005	A	-0.0051421	0.0056136
8:49549726:A:C	rs11778724	-0.078208287	0.065781455	0.07	0.013	C	0.041944	0.014848
8:5546824:C:G	rs17362923	0.00311825	0.017121136	0.023	0.004	G	0.0018604	0.0041212
8:59440824:A:G	rs10108398	-0.011148269	0.015052017	0.018	0.003	G	0.033021	0.0036035
8:72459889:A:G	rs13269725	-0.01393013	0.024407913	0.03	0.005	A	-0.015575	0.0059242
9:114603240:C:T	rs1547308	-0.019765104	0.016511056	0.032	0.004	C	0.0103	0.0040094
9:114828332:C:T	rs10817260	-0.008147011	0.017520413	0.043	0.004	C	0.0019397	0.0041679
9:127663551:AT:A	9:127663551_AT_A	0.033599659	0.013979242	0.018	0.003	AT	0.0014004	0.0033054
9:130327143:CA:C	rs776074878	-0.005266582	0.017071712	0.021	0.003	CA	-0.0097636	0.0037484
9:136145118:C:T	rs494242	-0.022648846	0.01400423	0.017	0.003	C	-0.033492	0.0033926
9:16252807:A:C	rs12683780	0.01572181	0.014920093	0.031	0.003	A	-0.0084422	0.0035019
9:16360889:T:C	rs4961485	-0.047761648	0.026165983	0.039	0.006	T	-0.0062063	0.0064261
9:34130435:G:A	rs61237993	0.006277677	0.019785162	0.04	0.004	A	-0.0060533	0.0048044
9:97713459:C:A	rs10821415	0.007361722	0.013409404	0.015	0.003	C	0.0034812	0.0032482
X:109883765:C:T	rs7884765	-0.01283645	0.01364934	0.024	0.003	T	-0.015377	0.0032943
X:152638744:T:G	rs67596711	0.018589137	0.013223576	0.039	0.003	T	0.0024824	0.0032047
X:70334233:G:A	rs12837203	0.002645368	0.014316341	0.019	0.003	G	-0.0028712	0.0034401
